# Supplementary material for: Influence of Acidic pH on Hydrogen and Acetate Production by an Electrosynthetic Microbiome
Source: PubMed Central journal article supplement (PMC4198145; doi:10.1371/journal.pone.0109935), 2014-10-15
Supplement: pone.0109935.s003.pdf [file pone.0109935.s003.pdf]

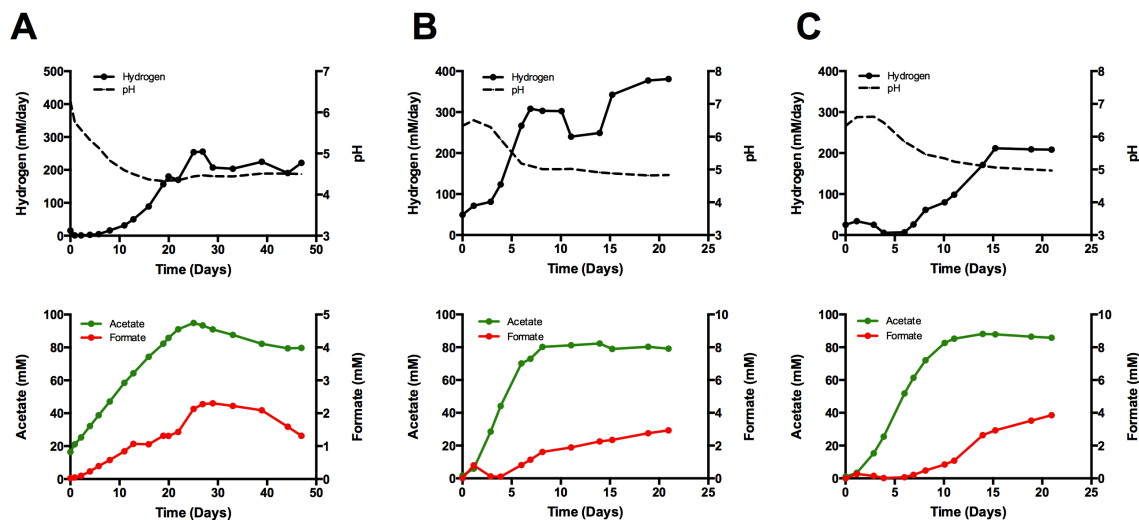

**Figure S3. Transferability and replication of the electrosynthetic microbiome.**

Granules were transferred from Reactor 4 (A) into Reactors 5 (B) and 6 (C) and exposed to lowered pH in phosphate buffered media containing 50 mM NaBES in the catholyte - 600 mV vs. SHE.
