# Supplementary material for: Influence of Acidic pH on Hydrogen and Acetate Production by an Electrosynthetic Microbiome
Source: PubMed Central journal article supplement (PMC4198145; doi:10.1371/journal.pone.0109935), 2014-10-15
Supplement: pone.0109935.s005.pdf [file pone.0109935.s005.pdf]

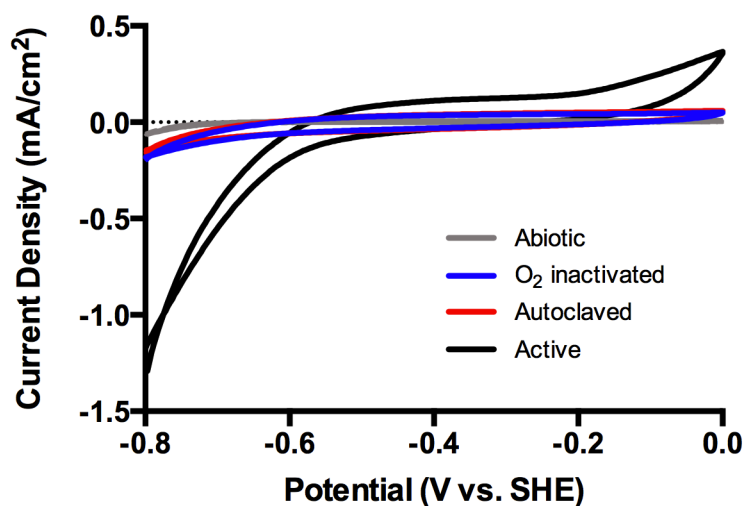

**Figure S5. Inactivation of an active biocathode.** Cyclic voltammogram of an active rod biocathode in phosphate buffered medium at pH=6.3 with 50 mM NaCl in the anolyte and catholyte, and 100% CO<sub>2</sub> sparge (black). The active rod was exposed to sterile flowing air (40 mL/min) for 20 hours and the scan was repeated under 100% CO<sub>2</sub> sparge (blue). The O<sub>2</sub> inactivated rod was then autoclaved on a gravity cycle for 30 min and the scan was repeated again under 100% CO<sub>2</sub> sparge (red). An abiotic sterile control (gray) and the autoclave and O<sub>2</sub> inactivation treatments showed far less cathodic current densities than the active biocathode.
