# Supplementary material for: Influence of Acidic pH on Hydrogen and Acetate Production by an Electrosynthetic Microbiome
Source: PubMed Central journal article supplement (PMC4198145; doi:10.1371/journal.pone.0109935), 2014-10-15
Supplement: pone.0109935.s006.pdf [file pone.0109935.s006.pdf]

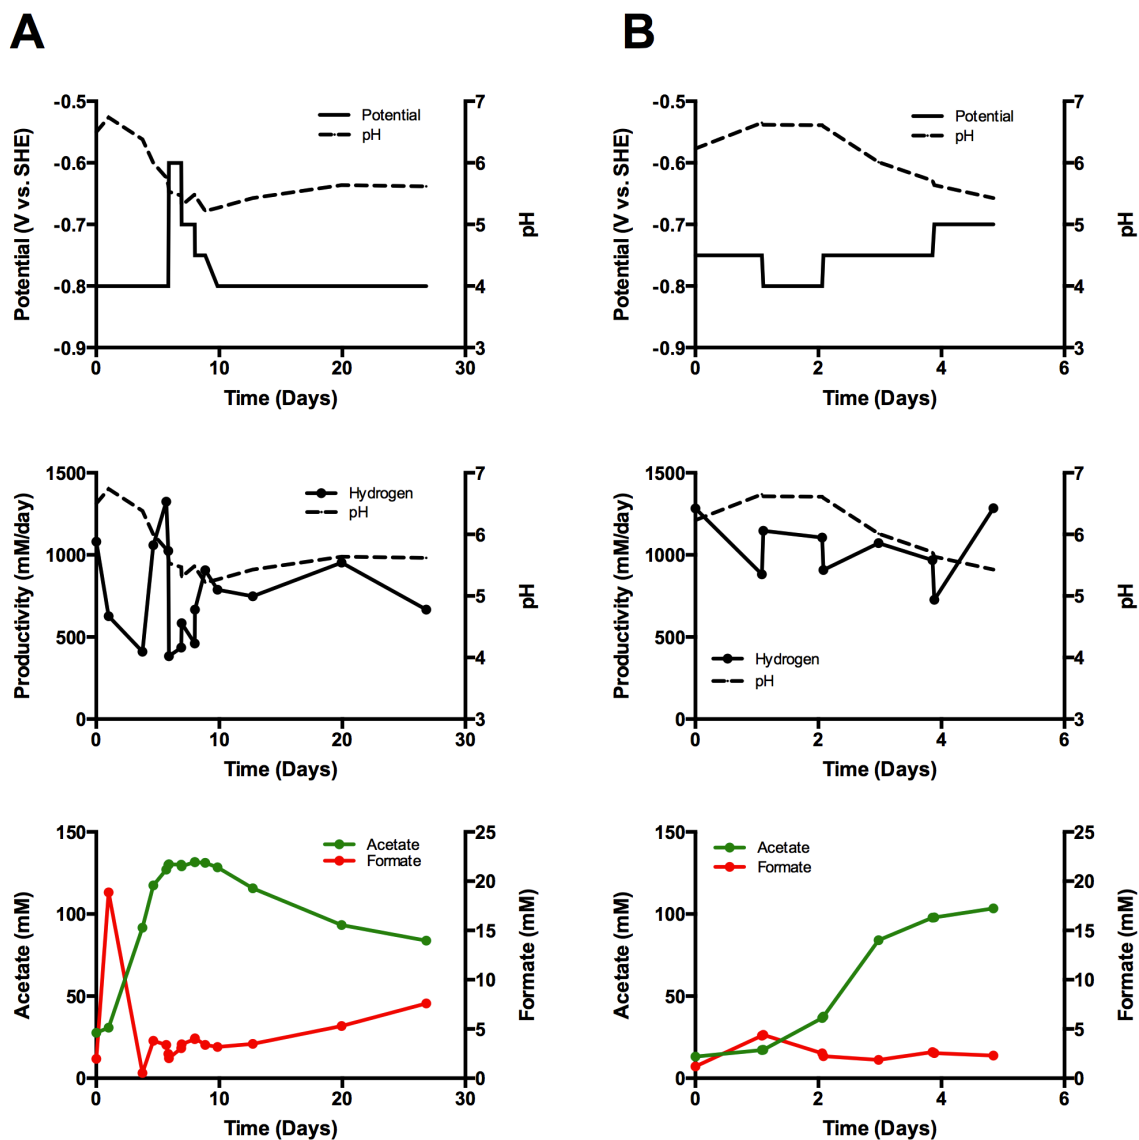

**Figure S6. Improved production at lower potential.** Sequential media replacements (A and B) of phosphate buffer medium with 50 mM BES in the anolyte and catholyte in Reactor 10 poised at -800 mV vs. SHE unless otherwise indicated.
