# Supplementary material for: Influence of Acidic pH on Hydrogen and Acetate Production by an Electrosynthetic Microbiome
Source: PubMed Central journal article supplement (PMC4198145; doi:10.1371/journal.pone.0109935), 2014-10-15
Supplement: pone.0109935.s007.pdf [file pone.0109935.s007.pdf]

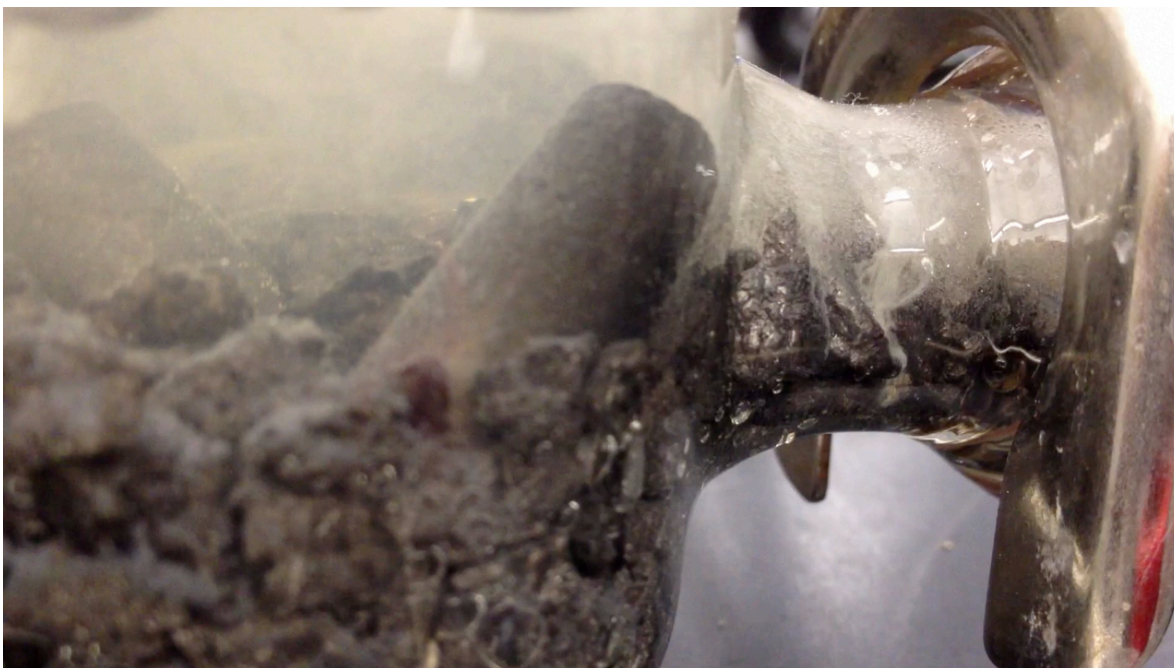

**Figure S7. Screenshot of hydrogen gas evolving off of a biocathode.** Video screenshot of a biocathode in phosphate buffered media poised at  $-600$  mV vs. SHE.
