# Supplementary material for: Influence of Acidic pH on Hydrogen and Acetate Production by an Electrosynthetic Microbiome
Source: PubMed Central journal article supplement (PMC4198145; doi:10.1371/journal.pone.0109935), 2014-10-15
Supplement: pone.0109935.s008.pdf [file pone.0109935.s008.pdf]

| Reactor | Figure | Electrode | Media       | Salt  |       | mV vs. SHE   | Hydrogen    | Formate    | Acetate     |
|---------|--------|-----------|-------------|-------|-------|--------------|-------------|------------|-------------|
| 1       | 1A     | Granules  | Bicarbonate | NaBES | C     | -600         | 330         | 0.7        | 4.4         |
|         | 1B     | Granules  | Bicarbonate | NaCl  | C     | -600         | 422         | 0.7        | 11.3        |
| 2       | S2A    | Granules  | Bicarbonate | NaBES | C     | -600         | 372         | 0.3        | 7           |
|         | S2B    | Granules  | Bicarbonate | NaCl  | C     | -600         | 327         | 0.7        | 9.4         |
| 3       | S2C    | Granules  | Bicarbonate | NaBES | C     | -600         | 328         | 0.31       | 3.4         |
|         | S2D    | Granules  | Bicarbonate | NaCl  | C     | -600         | 282         | 1.2        | 8.2         |
| 4       | S3A    | Granules  | Phosphate   | NaBES | C     | -600         | 256         | 0.2        | 5.2         |
|         | 2A     | Granules  | Phosphate   | NaBES | C & A | -600         | 510         | 3.6        | 15.8        |
|         | 4      | Granules  | Phosphate   | NaBES | C & A | -600         | 1304        | 1.2        | 7.7         |
| 5       | S3B    | Granules  | Phosphate   | NaBES | C     | -600         | 381         | 0.7        | 15.3        |
|         | 2B     | Granules  | Phosphate   | NaBES | C & A | -600         | 286         | 4.5        | 16.3        |
| 6       | S3C    | Granules  | Phosphate   | NaBES | C     | -600         | 212         | 0.5        | 12.6        |
| 7       | 3      | Rod       | Phosphate   | NaCl  | C & A | -600         | 3.9 (0.39)  | 0.2 (0.46) | 1.1 (3.16)  |
| 8       | 3      | Rod       | Phosphate   | NaCl  | C & A | -600         | 18.2 (1.82) | 0.9 (2.03) | 5.6 (6.28)  |
| 9       | 3      | Rod       | Phosphate   | NaCl  | C & A | -600         | 17.8 (1.78) | 0.8 (1.82) | 3.6 (10.84) |
| 10      | 5      | Granules  | Phosphate   | NaBES | C & A | -800         | 1323        | 4.54       | 51.6        |
|         | S6A    | Granules  | Phosphate   | NaBES | C & A | -800 to -600 | 1324        | 16.9       | 28.7        |
|         | S6B    | Granules  | Phosphate   | NaBES | C & A | -800 to -700 | 1284        | 2.9        | 51.9        |

**Table S1. Summarized parameters and maximum productivities for the reactors in this study.** Maximum productivities are in mM/day, and g/m<sup>2</sup>/day is in parenthesis for the rods. Presence of NaBES or NaCl in the catholyte or catholyte and anolyte is noted by C or C & A, respectively.
